# Supplementary material
Source: PubMed Central journal article supplement (PMC3773272)
Supplement: NIHMS476186-supplement-01.pdf [file NIHMS476186-supplement-01.pdf]

## Scopolamine Rapidly Increases mTORC1 Signaling, Synaptogenesis, and Antidepressant Behavioral Responses

### Supplemental Information

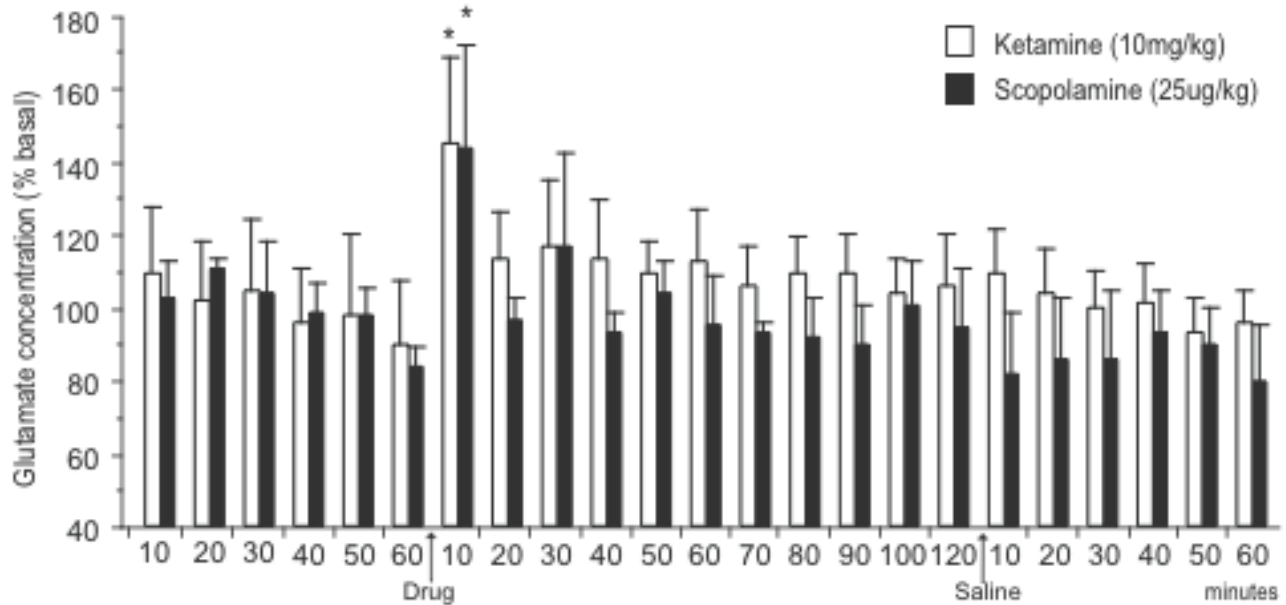

**Figure S1.** Scopolamine increases levels of extracellular glutamate in the prefrontal cortex (PFC). Quantitative analysis of extracellular glutamate levels demonstrating the effects of acute injection (i.p.) of scopolamine (25  $\mu$ g/kg) or ketamine (10 mg/kg) during the microdialysis session. Data are the means  $\pm$  SEM of extracellular glutamate concentrations in the PFC in each sample pre- and post-injection, and are expressed as percentage of the corresponding basal value (calculated as mean of the six basal samples). Repeated-measure ANOVA shows a significant effect of both scopolamine ( $n = 5$ ) and ketamine ( $n = 4$ ) in the 10 min sample right after drug injection. There was no significant effect of saline, administered after 120 min. \* $p < 0.05$  compared to basal concentration of glutamate for each animal group.
